# Supplementary material for: Exploring the Mechanisms Underlying the Therapeutic Effect of Salvia Miltiorrhiza Against Diabetic Nephropathy Using Network Pharmacology and Molecular Docking
Source: Research Square preprint supplement (doi:10.21203/rs.3.rs-85980/v1), 2020-10-08
Supplement: Supplementary file 1 [file febbdc0d4fea11fc6a3003b8.xlsx]

## Sheet: Sheet1
SM	GeneCards	DisGeNET	Commom
PTGS1	INS	ACE	MMP2
CHRM3	ACE	ALB	XDH
CHRM1	HNF1B	FN1	EDN1
SCN5A	KCNJ11	NFE2L2	NOS2
CHRM5	GCK	NOS3	CD38
PTGS2	ABCC8	SERPINE1	BCL2
HTR3A	HNF4A	PPARG	EDNRA
CA2	HNF1A	CCL2	GSTP1
CHRM4	PPARG	TGFB1	PTPN2
RXRA	PDX1	TGFBI	CYP19A1
OPRD1	VEGFA	MFN2	TNF
PDE3A	WFS1	TXNIP	PTGS2
ADRA1A	REN	AGT	ESR1
CHRM2	NEUROD1	ACE2	VEGFA
ADRA1B	INSR	VEGFA	MMP1
SLC6A3	IL6	CNDP1	MMP12
ADRB2	AGTR1	ADIPOQ	NR3C2
ADRA1D	PAX4	ELMO1	HMOX1
OPRM1	ALB	INS	GLO1
GABRA1	LEP	SOD2	ALOX12
CHRNA7	CCL2	PON1	IL10
NCOA2	UMOD	RELA	MAPK1
NCOA1	TCF7L2	GAS6	MDM2
DRD1	PON1	CNDP2	EGFR
HTR2A	NOS3	HNF1A	IL4
SLC6A4	KLF11	AOC3	F10
PGR	AGT	CDKN1A	AKR1B1
NR3C2	IGF1	COL4A1	PTPN6
ACHE	APOA1	KDR	TP53
DRD2	TGFB1	KLK1	CASP9
F2	ADIPOQ	LEPR	CDKN1A
ESR1	SLC2A2	MDK	HTR2A
AR	RETN	TGFBR2	FASN
DPP4	IRS1	CST3	NR1H3
F10	B2M	CCN2	PTPN11
PTPN1	SLC30A8	DGKH	DPP4
PRSS1	SOD2	AGER	PPARG
PRKACA	APOE	AGTR1	MAPK14
PIK3CG	BLK	HAVCR1	STAT3
RELA	TNF	TINAG	ARG1
EGFR	IL1RN	HIF1A	NOX4
AKT1	HLA-DQA1	ICAM1	CASP7
VEGFA	CTLA4	IL1B	IL6
CCND1	AVPR2	IL6	CASP3
BCL2L1	HLA-DRB1	LCN2	PARP1
CDKN1A	AKR1B1	MIR145	ITGA2B
CASP9	HFE	MMP9	PIK3CG
MMP2	AQP2	MYCN	ADORA1
MMP9	FOXP3	NOX4	IL2
MAPK1	CRP	AXL	SYK
IL10	AVP	PRKCE	IFNG
RB1	ENPP1	PTEN	ICAM1
CDK4	SLC2A4	PTPN11	RELA
TNF	AKT1	REN	SLC2A4
JUN	EPO	SLC2A1	NOS3
IL6	HLA-DQB1	TNF	INSR
CASP3	AGER	TNFAIP1	AKT1
TP53	GLIS3	TRPC6	ITGB3
NFKBIA	IGF2BP2	VDAC1	PTGS1
XDH	SLC2A1	VDAC2	NR1I2
TOP1	LEPR	ALPK1	JUN
MDM2	CAT	KL	CD40LG
APP	CAPN10	MTOR	PRSS1
MMP1	COL4A1	BMP7	MMP9
PCNA	PTF1A	IGF1
ERBB2	GCG	MMP2
PPARG	IGF2	SERPINF1
HMOX1	EIF2AK3	PRKCB
CASP7	NLRP3	PTGS2
ICAM1	LPL	HMOX1
MCL1	IRS2	STAT3
BIRC5	IL2RA	CAT
IL2	ADRB3	GSK3B
CCNB1	PTPN22	JAK2
TYR	MIR21	AGTR2
IFNG	KCNQ1	TP53
IL4	STAT3	TRPC1
TOP2A	CCR5	HNF4A
GSTP1	GHR	PRMT1
XIAP	MTNR1B	IGF2
SLC2A4	NEUROG3	SPP1
INSR	SERPINE1	SREBF1
CD40LG	BSCL2	CASP3
PTGES	PTH	UTS2
NUF2	TTR	CLU
ADCY2	PIK3R1	CYP19A1
MET	IAPP	NQO1
NOS3	SLC12A3	G6PD
CDCA2	NPHS1	GHR
PIM2	CD79A	HSPA5
CCNA2	DPP4	NPPA
ADRA2A	SLC5A2	ERRFI1
ADRA2C	ICAM1	CCL20
NOS2	AGPAT2	SELP
ESR2	ZFP57	SPARC
MAPK14	CEL	TIMP2
GSK3B	AIRE	C3
NR3C1	FN1	VCAM1
KCNH2	APOB	CUBN
KCNMA1	STAT1	BECN1
STAT3	SUMO4	CD36
EDN1	TP53	HDAC4
CHEK1	PCBD1	CREB1
CHRNA2	GAD2	EP300
DPEP1	BMP6	ESR1
DRD5	MC4R	DKK1
F7	PLAGL1	UTS2R
HTR1A	FLT1	HSPB1
GABRA2	CCN2	HTR2A
GABRA5	IL10	IGF1R
SLC6A2	EDN1	LAMB2
GABRA3	ADRB2	NOS1
HTR2C	CDKN2A	ATP5F1B
ADRA2B	POMC	PROS1
HTR1B	MTHFR	C5
GABRA6	WT1	FGF23
GABRG3	VCAM1	CASP9
GABRE	IGF1R	TRIP10
BCL2	NAGLU	KEAP1
FOS	F2	HDAC5
AHSA1	CST3	CASP12
FASN	IL1B	CDKN1B
EDNRA	RBP4	CFL1
CYP3A4	RFX6	CAPN10
CYP1A2	HRAS	COL1A1
MYC	IFIH1	ADORA1
CYP1A1	BDNF	GRK2
NR1I2	GATA6	GRK3
NPM1	MBL2	EDNRA
ECE1	CASR	EPAS1
PARP4	GNAS	GRK4
CALCR	SAA1	GRK6
ITGB3	IL18	GSR
MMP12	APPL1	HAS2
CA7	MAFB	HDAC2
CA12	SOD1	FAS
CA4	CDKAL1	SMAD6
MMP16	CD40LG	MLLT3
AKR1B10	DNAJC3	NDUFS3
TYMS	LCN2	NTRK2
ABCB1	FTO	PAX2
PTPN2	NPHP1	AZIN1
PTPRA	WRN	PLAU
ITGA2B	APOA2	BDNF
ITGB6	C3	TF
ITGA4	IGFBP1	TGIF1
NPC1L1	VDR	VTN
AKR1B1	HK1	XDH
CES1	AMBP	CASP7
CES2	TLR4	CASP8
HMGCR	HLA-DPB1	CCNE1
CYP51A1	MMP9	ACVR1
CYP19A1	CLCNKB	CD38
NR1H3	NPPA	MYH9
CYP17A1	PTPRN	APOL1
RORC	G6PC	JAK1
NOX4	FOS	LIMK2
CDK5R1	MIR17	SFI1
MAOA	LMNA	SORBS1
FLT3	IER3IP1	PPARGC1A
CCNB3	PRKCB	CHN2
ALOX5	CXCL8	NLRP3
ADORA1	FOXC2	CTNNB1
GLO1	VWF	DECR1
SYK	MUC1	SLC30A8
PARP1	IL4	DPP4
TTR	CETP	AKT1
CD38	ATM	MMRN1
CYP1B1	IGFBP3	FOXO1
ABCG2	SST	AKR1B1
TNKS2	HP	SASH1
TNKS	MIR192	SIRT1
ARG1	SELE	DIANPH
PTPRS	APOC3	GABPA
ABCC1	HPRT1	FGF21
HSD17B1	BGLAP	GLP1R
CDK6	NAMPT	GUCY1A1
HSD17B2	LPA	APOE
ALOX15	TLR5	IL10
ALOX12	XPNPEP3	IL18
ADORA2A	INS-IGF2	ITPR1
CSNK2A1	TSC1	MIR192
PTPN6	MEG3	MIR21
PTPN11	MT-TL1	MBL2
EED	FGA	NR3C2
FYN	CAV1	MTHFR
TERT	MYH9	DRG1
POLA1	CNDP1	PDE3A
POLB	NOS2	PIK3CA
	HBA1	PIK3CB
	NPHS2	PIK3CD
	TNFRSF11B	PIK3CG
	ST3GAL4	ENOX1
	ALMS1	GPR158
	IFNG	ACTB
	MAFA	IGAN1
	SLC19A2	ST3GAL4
	TSC2	SLC5A2
	GGT1	TLR4
	NPHP4	VDR
	THBD	NAV3
	EGF	KCNH7
	MIR483	RNF185
	AOC3	LARGE1
	MIR155	TBC1D31
	CISD2	RAPGEF5
	UCP1	HPSE
	SGK1	CCR5
	GAD1	MOK
	SLC12A1	SLC12A3
	NPPB	NPHS2
	LIPC	CYBA
	CFTR	EGF
	RHO	EGR1
	HMGCR	GCG
	CAVIN1	ENPP1
	TLR2	CCR2
	MIR140	UMOD
	GH1	MAPK14
	PRODH	ANGPT2
	PVT1	HP
	SERPINB7	SMAD1
	MTOR	MAPK1
	MT-ND1	TCF7L2
	COL4A5	ATP6AP2
	GHRL	CRP
	IDDM4	ABCA1
	IDDM7	GH1
	IDDM8	IL1A
	LTA	MALAT1
	FGF2	PPARA
	HHEX	CCL5
	GCKR	SGK1
	IGFBP2	SOD1
	MME	EHMT1
	IL2	ACTN4
	IDDM11	GDF15
	HMOX1	ZGLP1
	IDDM13	STAM2
	MMP2	AHSA1
	IDDM3	CRK
	SELP	EGFR
	LHX1	F2RL1
	AGTR2	ANGPTL2
	NPY	RNF19A
	CDKN3	POLDIP2
	CXCL10	GREM1
	BBS2	GJA1
	SIRT1	HDLBP
	AR	HMGB1
	CP	KNG1
	APOA4	MIR126
	HLA-A	MIR27A
	GAPDH	SMAD7
	MIR377	NPHS1
	MAPK1	HEBP1
	LEPQTL1	PRKAA2
	HBB	MAPK8
	AKT2	AZU1
	ANGPTL8	B2M
	MT-CO2	PNPLA2
	COG2	RENBP
	AHSG	ROS1
	SELL	GORASP1
	COL4A3	WNK1
	HSPD1	SYT1
	CD4	THBS1
	PTGS2	TIMP3
	PF4	TNFRSF1A
	TNFRSF1A	UCP2
	MIR126	VPS51
	COL4A4	BEST1
	MAPK14	SLBP
	TH	AIMP2
	IL17A	NR1I2
	CCR6	SELENBP1
	TPO	GRAP2
	TF	PGR-AS1
	FABP2	CETP
	SERPINF1	LRG1
	SOCS1	CNR1
	UCP3	ADM
	LCAT	CYP11B2
	ACP1	DCN
	MAPK8	EDN1
	NOD2	NRK
	CD36	FGF2
	SPP1	FOXC1
	CEP290	GSTM1
	NR3C2	ACACB
	ICOSLG	IHG1
	CASP3	CXCL8
	HLA-B	IL17A
	ADM	INSR
	IDDMX	IRS1
	IDDM6	SUMO4
	TAP2	LRP2
	IDDM17	MIR130B
	APOC2	MIR25
	VTN	SMAD3
	IDDM15	MAP3K5
	SOCS3	MME
	BBS1	MMP3
	ANGPT2	MPO
	HIF1A	MLXIPL
	GLO1	PLG
	ITPR3	CCHCR1
	UTS2	THG1L
	IDDM23	TUG1
	IDDM24	PRKAA1
	PTPN1	PRKAB1
	H2AC18	MAPK3
	PRL	PTX3
	IL1R1	PVT1
	REG1A	RPS19
	ATF6	XYLT2
	IDDM18	SHBG
	GLP1R	SLC2A2
	SORD	BMP4
	XBP1	SOAT1
	FASLG	STAT1
	PAX6	ADAM17
	GFAP	HNF1B
	PRKCD	TLR2
	HGF	NOX5
	PCSK1	LOH19CR1
	MIR223	CAV1
	MEN1	APLN
	FABP1	CD44
	CYP3A4	DNM1L
	PGF	CDKN2A
	BBS7	SEMA3A
	TMEM67	KHDRBS1
	SCT	NFAT5
	ABCA1	DBA2
	GLA	KLF6
	TLR9	CPT2
	PPARA	CRMP1
	NKX6-1	PARP1
	ELN	DGKA
	MPO	DNMT1
	APOA5	ENG
	HAVCR1	EPO
	MIR30A	F2R
	CTNNB1	FABP4
	COQ2	FABP1
	IFT88	FGF1
	TLR3	DAPK2
	CYP27B1	CD2AP
	GC	FRMD3
	NGF	NOX1
	MAPK3	OR10A4
	JUN	HGF
	CFH	HLA-DRB1
	THADA	APEX1
	LMX1B	HSPG2
	ITGAM	IFNG
	MIR15A	IL1RN
	MEFV	IL4
	HSPA1A	INPPL1
	CD28	KCNQ1
	G6PC2	LGALS3
	PTPN3	LPL
	SRC	MIR146A
	PPARGC1A	MIR155
	PLG	MIR199B
	UCP2	MIR29B1
	CYP21A2	MIR29B2
	CD40	MIR30C1
	STAT5B	MIR30C2
	SNRPN	MIR93
	PARP1	ARRB1
	HSPA4	SMAD2
	UBD	MEFV
	CPE	ATM
	MKS1	NOS2
	MIR146A	NOTCH1
	BBS5	MIR377
	IL6R	MBL3P
	CDKN1C	ADIPOR1
	APOL1	ANGPTL4
	SEC61A1	PKM
	F3	SLC52A1
	CDC123	MEG3
	KDR	PRKCA
	PECAM1	PTH
	PTEN	TRIB3
	SLC30A10	CXCL16
	GSR	RAC1
	ADD1	BCL2
	CYP1A2	S100A8
	BBS4	NOD2
	TG	XYLT1
	CCL5	TGFA
	CRYAA	TIMP1
	IFT140	TKT
	IFT172	TNFRSF1B
	PTPRN2	TYRO3
	IGF2R	UTRN
	POLG	CALD1
	FOXA2	DENR
	PRKAB1	XPR1
	CASP1	CD59
	CXCL12	CD68
	MMP3	CDC42
	IL1A	NAT2
	SHBG	OPTN
	TGM2	EBI3
	C4A	KLF2
	XDH	NSA2
	ACE2	HYOU1
	HSD11B2	POSTN
	TAP1	RN7SL263P
	MIR199A1	MCS+9.7
	TIMP1	H3P10
	F8	CCR1
	ICA1	SLCO6A1
	SPINK1	CPT1A
	CYP19A1	NRG4
	TGFB2	CTSB
	MAPT	GPBAR1
	TREX1	PAQR3
	ESR2	CYP4B1
	LRP2	DDOST
	PLAT	DUSP1
	CD2AP	APLNR
	PPY	LPAR1
	PRTN3	ELAVL2
	SERPINC1	EPHX2
	TLR1	ERBB4
	LRP5	F5
	IL15	F10
	TRPC6	PTK2B
	JAK2	FGF13
	PIK3CA	VASH1
	HK2	PHLPP1
	BMP7	BRD4
	SLC5A1	PES1
	CAMK1D	LPAR3
	GATA3	DDAH1
	SDCCAG8	NUP62
	SYNPO	ALOX12
	FAS	GFPT1
	MALAT1	IL17B
	CCND1	GLO1
	NFKB1	NEAT1
	PKD2	GRN
	JAZF1	KLF15
	APRT	GSTP1
	IL13	GSTT1
	RPGRIP1L	GTF2H1
	DLK1	RMC1
	AGXT	HFE
	ATF4	HLA-DQA1
	RPS6KB1	HES1
	TNFRSF25	APOA1
	PDGFB	APOA4
	TRPV4	APOC3
	SLC5A4	IL5
	BRAF	GSTK1
	GPT	LIPC
	MIR181A2	LOXL2
	H19	LRP6
	CREB1	LRPAP1
	PCK2	MIR141
	RPGR	MIR150
	KIF7	MIR15A
	AHI1	MIR15B
	ESR1	MIR200B
	TLR7	MIR203A
	APP	MIR214
	ADIPOR1	MIR22
	ANGPT1	MIR29A
	RET	MIR29C
	EP300	MIR30A
	FABP12	MCAM
	PPP1R15B	CXCL9
	HSPA5	MMP10
	PDCD1	TRNT
	HBA2	NFKB1
	MMP1	NPY
	F5	NPPB
	ROBO2	TNFRSF11B
	ONECUT1	IL20
	CCL11	DCTN4
	SCGB1A1	PLEKHO1
	CD38	ISYNA1
	FABP4	PDGFA
	SERPINA3	GHRL
	IL18R1	TREM1
	FGF21	PPIA
	NPHP3	AVP
	CLEC16A	PTPA
	FNDC5	MIOX
	CYBA	PROC
	RAC1	CHPT1
	TLR8	PTAFR
	THBS1	PTHLH
	FGF23	SEMA6A
	HSPG2	MRTFA
	HLA-DMA	ZNF410
	NR1H2	RARRES2
	ISL1	RBP4
	WDR19	GAS5
	TKT	BCR
	MLXIPL	RRAS
	PON2	BGN
	SH2B3	SDC2
	MASP1	TSPYL2
	PBX1	HHIP
	CD8A	BMP2
	NR3C1	SLC5A1
	OFD1	UCA1
	CNTF	SMN1
	INVS	SMN2
	GPX3	SNAI1
	SLPI	SNRNP70
	CFB	STAT5A
	BSND	STAT5B
	TTC21B	STK11
	TIMP2	BSG
	INF2	ABCC8
	TLR6	SYK
	BLM	MAP3K7
	MTTP	TALDO1
	GRHPR	TBX1
	PCK1	ZEB1
	TFRC	NR2C2
	ACTN4	C5AR1
	RFC2	POTEF
	DMPK	TXN
	PCSK2	UCP1
	PSMB8	KDM6A
	CYCS	VEGFC
	MAF	VIM
	PTX3	VWF
	HLA-DMB	WFS1
	CTSB	XBP1
	KCNQ1OT1	YY1
	FOXO1	MIR770
	FXYD2	CXCR4
	MIR125A	FTO
	TIMP3	ADIPOR2
	PAX2	LIN28A
	TMEM216	HMGA2
	SLC22A11	CARS1
	CD86	ULK1
	CLU	NLRC5
	CD80	SYVN1
	PTGDS	ORAI1
	TNFSF11	ABCC11
	PAPPA	SOCS1
	HLA-DRB3	IRS2
	MIR342	IQGAP1
	PKHD1	SOCS2
	CASP8	TSC22D1
	CC2D2A	SPHK1
	GIP	SQSTM1
	IFT80	IL33
	PSTPIP1	SLC33A1
	F9	KLF4
	HMGB1	ACVRL1
	WDR4	ROCK2
	KRAS	ENTPD1
	MT-CO1	ZEB2
	ADIPOR2	NR1H4
	PRKAR1A	CDH2
	PRKAA2	MIR675
	SLC2A9	CDKN2B-AS1
	APLN	HOTAIR
	TRH	MIR874
	SPRY2	LINC00462
	GAST	MFT2
	PSMB9	MIR1207
	FBN1	MIR320E
	MET	MIR3196
	SMAD2	MIR23C
	PIK3CG	ARAP1-AS2
	MIR29A	LINC00968
	SMAD3	MICOS10-NBL1
	PKLR	MIR4490
	VIPAS39	MIR4756
	MT-TS2	NR1H3
	KLF14	ARAP1-AS1
	MIR181A1	CDH13
	IFT27	MBNL2
	G6PD	ADAM10
	GNB3	CDK5
	MIR144	CALCRL
	IKBKB	RAMP2
	TAB2	LOC102724334
	GYS1	TP53COR1
	TNFRSF1B	AKR1A1
	MIR217	TFG
	BMP2	TRDN
	GREM1	CORO2B
	FGF8	BASP1
	MT-ND4	YAP1
	KCNJ1	FST
	LRBA	TIMM44
	GJB2	EIF3M
	PSMD9	UNC13B
	CNR1	CEBPB
	ELMO1	WSPAR
	DDC	CCT2
	PIK3C2A	MTHFS
	PODXL	PDPN
	RARRES2	IGF2BP2
	MT-CO3	CAMKK2
	TNFRSF10A	MTCO2P12
	HSPB1	OGA
	KNG1	MASP2
	ACACB	GRAP
	MAPK10	PLK2
	TXNIP	MALT1
	C12orf43	RIPK3
	MIR216A	ESM1
	EDNRA	ADAMTS13
	CDKN2B	CHI3L1
	TNFSF10	CHIT1
	MT-ND6	PACSIN2
	FOXM1	VSIG4
	HSP90AA1	ADCY8
	GSTM1	ESCO1
	CELA3B	APOA5
	MIR29C	ARAP1
	MIR142	ADD1
	CYP11B2	ADD2
	EGFR	CYP2R1
	SP1	PLIN2
	MICA	CCR6
	ITLN1	ACKR2
	HMX1	CMKLR1
	PLEK	ADH1B
	CCDC28B	COL1A2
	ETS1	COL4A5
	MT-ND5	COL6A3
	PLA2G7	COL8A1
	VPS33B	COL8A2
	PRDM10	RBM45
	MNX1	COL11A2
	CCL3	PLEKHH2
	CD2	COX8A
	NLRP1	CP
	KL	CPB2
	SERPINA12	CPT1B
	CD69	CR1
	CDK4	CREM
	MIR196A1	SRXN1
	HLA-DPA1	CRYZ
	NR5A1	CSF1R
	L1CAM	PWAR1
	SOD3	CSNK2A2
	COMT	CDAN1
	NRAS	VCAN
	MIF	IL34
	ESRRA	CST2
	STYX	SLC30A7
	MIR210	CTSD
	PTPRC	PLB1
	NOX4	RMDN2
	PTHLH	GLIPR2
	PLA2R1	CYBB
	NKX2-2	CYLD
	MIR25	CNKSR3
	GHRH	SLC2A12
	MEG8	CYP24A1
	IGF2-AS	CYP27B1
	ARL3.00	FITM1
	GFPT1	DBP
	CPT2	DDIT3
	MKRN3	DDT
	MEST	DEFA1
	HLA-DQA2	DEFA3
	NTF3	DES
	CTNS	CFD
	COL4A2	AFM
	PTPN11	DMP1
	ACSL4	DNMT3A
	MT-TK	DNMT3B
	GAS5	DPYD
	GUSB	DPYS
	APOM	DRD3
	OAS1	JAG1
	HAMP	ATN1
	CLCN5	RCAN1
	CDH4	DSPP
	BAX	DUSP4
	GZMB	E2F1
	CDH5	E2F3
	NRP1	EDA
	INSM2	EFNA1
	CSN2	ARID2
	IGHV4-38-2	AHSG
	ADA	ELAVL1
	SLC22A6	ELF3
	SREBF1	MARK2
	SOX17	ENO2
	AP4B1-AS1	ENPEP
	GNRH1	PRSS55
	GDNF	EPHA1
	PPARD	EPHB2
	IPW	EREG
	CREBBP	ETF1
	SHROOM3	ETS1
	MT-TQ	ALCAM
	CIITA	EZH2
	ITGA8	FABP2
	MIRLET7D	ALDH2
	INPP5E	FASN
	MAP2K7	FGF11
	BAMBI	GPC5
	MIR675	FHL2
	UBASH3A	MRAS
	UFM1	SCAF8
	CDK5RAP3	NLRP1
	DDRGK1	PLA2R1
	UFL1	ATF6
	MFN2	DAAM1
	ALDH2	PALLD
	NEU1	SMG1
	EDNRB	ERP44
	MGP	MCF2L2
	PRPF8	MPRIP
	HMGA2	FLT1
	CYP1A1	FLT4
	HES1	SLC9A8
	KLKB1	TNS2
	PRSS1	CRTC1
	GAS6	SRGAP2
	LOC108783645	SIRT4
	PRKCA	SIRT3
	ANGPTL4	SRRM2
	KIR3DL1	DDAH2
	SHOX	FPR2
	MLN	PLA2G15
	CCK	RAB38
	TSHR	CADM1
	ZMPSTE24	NR5A1
	SLC17A5	GAST
	MYOD1	FNDC5
	BMP4	FUT8
	CDH1	CASC2
	MIR145	LINC01619
	MT-TW	TNFAIP8
	DYNC2H1	POU2F3
	GSTT1	SOSTDC1
	RECQL4	WWTR1
	MIR34A	IPCEF1
	SLIT2	GC
	SLC22A12	GCK
	NUDT10	SLC17A5
	HNF4G	GIPR
	NSD1	GJB1
	CFHR1	ANKRD1
	IFNA1	FOXP1
	MIR503	PALD1
	SEL1L	INTU
	AHR	SMPDL3B
	NFE2L2	RBMS3
	H6PD	HPGDS
	SCARB1	RABGEF1
	PKD1	AMT
	MT-TF	AQP11
	MT-TS1	ANG
	TNNT2	ANGPT1
	PAFAH1B1	FFAR2
	FGFR3	GPX1
	BAIAP2L1	GPX3
	TRPV1	GPX4
	ADAMTS13	GRB2
	SLC30A9	REM1
	TOR1A	PYCARD
	SLC9A1	GSTM2
	RELA	IL19
	ALOX12	HLA-B
	PRSS16	HLA-DPA1
	APOC1	HMGN1
	RYR1	NR4A1
	PCIF1	FOXA1
	ART1	HNMT
	MIR93	HPT
	TMEM237	HSD11B2
	PDGFA	HSPA1A
	NRL	HSPA1B
	CD44	HSPA4
	CD3D	HSPB2
	PROC	IAPP
	DDX41	APOB
	IL12B	LINC01139
	POSTN	ID2
	OGA	APOC1
	SORBS1	GOLGA6A
	FRMD3	IDUA
	APOH	IFNA1
	NOTCH1	IFNA13
	MIR214	SOX2-OT
	TRAF3IP1	IGFBP1
	PLA2G1B	IGFBP3
	MMP14	IGFBP4
	IL5	HCN1
	SMAD4	IGFBP7
	MT-TH	APOH
	EIF2S1	RBPJ
	STAT5A	APRT
	SNHG6	IKBKB
	MIR148B	IL1R1
	BAZ1B	IL2
	CDH23	IL6R
	CUBN	IL6ST
	ALAD	CXCR1
	INPPL1	CXCR2
	SOX2	AQP1
	SNHG18	AQP2
	FCAR	IL12RB1
	OLR1	IL13
	BCHE	IL15
	JCHAIN	AQP5
	SERPINA1	INHBC
	LIG4	CXCL10
	ANXA5	IRAK1
	CDKN1B	ITGA1
	CDKN2B-AS1	ITGA2B
	DMD	ABCC6
	ENSG00000257553	ITGAM
	CARTPT	ITGB3
	BAD	JUN
	PPIG	KCNJ11
	GIPR	KHK
	TRIB3	ARF6
	SDHB	ARG1
	CASP9	KPNA2
	SCNN1A	ARG2
	ABCG1	KRT16
	TEK	LAD1
	MIR26B	LAMP2
	GSN	LCK
	TGIF1	LCN1
	FREM2	LEP
	TBL2	LGALS1
	SP3	LMNA
	JAK1	LPA
	PRKCZ	LRP5
	MGAM	LTA
	USF1	LTBP1
	SHC1	MIRLET7A2
	FAM167A	MIRLET7A3
	SYVN1	MIRLET7B
	CALCA	MIRLET7C
	TMEM231	LYZ
	TFR2	MIR125A
	CSF1	MIR132
	IQCB1	MIR134
	CABIN1	MIR137
	TNFRSF11A	MIR152
	CSF2	MIR154
	ABCB1	MIR181A2
	CARS1	MIR182
	FGFR1	MIR184
	CISD1	MIR188
	PTGS1	MIR20A
	GPX1	MIR200C
	CPT1A	MIR206
	FOXO3	MIR210
	DIANPH	MIR217
	RTL1	MIR221
	HTR2A	MIR223
	GJA1	MIR23A
	CCKAR	MIR23B
	NOS1	MIR27B
	GLIS2	MIR302A
	SCNN1B	MIR30B
	F7	MIR30E
	KCNJ10	MIR31
	POMGNT1	MIR320A
	GTF2I	MIR33A
	LBR	MIR34A
	GGNBP2	MIR34B
	SIRT3	MIR96
	CLDN19	MIR98
	DRD2	MIR99B
	BTNL2	ARRB2
	COL8A2	SMAD5
	FASN	STS
	TUG1	MAP6
	PDP1	MB
	IGFBP7	MCM3
	CDKN1A	MDM2
	CXCR4	MAP3K1
	LIMK1	MEP1B
	CYP2D6	MFAP1
	NAGA	MGP
	CYBB	MIF
	RBP1	MLN
	ARG1	KMT2A
	GTF2IRD1	MMP1
	CLIP2	MMP7
	HPN-AS1	MMP8
	OCRL	MMP12
	ENTPD1	MIR133B
	MKKS	MIR342
	AXL	MIR374A
	HPSE	MSN
	NUP107	MSX2
	PNLIP	COX1
	RHOA	COX2
	CLTRN	MYD88
	AKT3	MYH2
	ACHE	NBL1
	SMURF1	NCK1
	PPP1R3B	NCL
	SLC2A3	NDN
	TAC1	NFIA
	ITGA2	NFIB
	TOMM40	NFIC
	CDC42	NFIX
	TTC8	NFKBIA
	ERBB2	NOTCH2
	PSMA5	NOTCH3
	EPHB4	ATP2A2
	FABP3	ACR
	IL12A	YBX1
	HLA-C	NTRK1
	MT-ATP6	MIR378A
	NTS	MIR379
	COL1A2	MIR382
	SIRT6	MIR424
	F10	OGN
	CLDN16	OLR1
	WDR35	P2RX7
	VIM	PEBP1
	GSTP1	PAEP
	P3H4	DUOX2
	DGKB	NOX3
	ARAP1	SERPINB2
	KCNK16	IL22
	C2CD4B	PARN
	MB	TAS2R13
	AFP	FOXP3
	FAM20A	SOST
	UBR1	ACOX1
	C2CD4A	DERL2
	CISH	FIS1
	IFNB1	RMDN1
	MTR	IRAK4
	TBX18	PCSK1
	CYB5R4	TRIAP1
	MIR27A	SIRT7
	MPZ	SIRT6
	CFAP47	PDGFRA
	LEMD3	GDE1
	ITGA4	PIAS4
	GP1BA	PDGFRB
	RECK	PDK1
	AQP5	GPRC5B
	TGFBR2	PECAM1
	NEK8	PGC
	NR5A2	PIK3C2B
	PRCD	PIK3R1
	GDF15	PIK3R2
	COL7A1	PIN1
	HSPA8	PITX2
	FOXP2	PKD1
	SEC23B	PLA2G1B
	MIA2	DUOX1
	TCF4	H2BS1
	CYP2C9	TERF2IP
	MIR106B	PON2
	NOTCH2	PPARD
	SLC26A4	PPBP
	KCNN4	TET2
	CSF3	CDKAL1
	MIR122	ANO1
	SCG5	PPP1R8
	ITGB2	RMDN3
	DDIT3	RCBTB1
	ADCY10	KIRREL1
	NPPC	FBXW7
	ALDOB	AVPR2
	MIAT	MIR449A
	EIF2AK4	SOX6
	MIR146B	STAP2
	CXCL1	SYBU
	LAMA1	VAC14
	ZFAND3	FAR2
	SCNN1G	PRKCSH
	CFHR2	ACSS2
	GRB10	APOM
	TNNI3	MAP2K2
	C1GALT1	MAP2K7
	SI	PRSS1
	ZBED3	PRSS2
	BDKRB2	RETN
	MERTK	PSMA6
	STAT4	PNO1
	BCL2	NMUR2
	S100A8	KMT5AP1
	CD34	PSMD9
	DUSP1	PTBP1
	CISD3	PTGDS
	CDK2	MIR20B
	ENG	MIR18B
	SLC9A3	PTGS1
	BBS10	MIR451A
	DNMT1	MIR485
	ANPEP	MIR488
	DRD5	MIR497
	TSC22D1	MIR499A
	MIR32	MIR503
	PDSS2	SCAF4
	SLC34A1	PTK2
	AGRN	LRRC7
	IL7R	STIM2
	TMEM126A	PTPN2
	SLC9B1	PTPN6
	CBS	NLRC4
	SERPINF2	RAB3A
	NR2F2	ACTA2
	DYNC2LI1	RAP1A
	MYC	RDX
	SLC26A1	RFC1
	IDH2	RNASE2
	GCC1	BRD2
	CD63	ROCK1
	STUB1	RPL36A
	LAMB2	RPLP0
	OPA3	RPS6
	ATXN10	MIR486-1
	PDE5A	MIR455
	FOXA1	RPS27A
	TBX21	BDKRB2
	NSA2	S100A4
	CHI3L1	S100A9
	HNRNPUL2-BSCL2	S100B
	ACADS	SAA1
	IDH1	SAA2
	TUSC3	SCD
	FOXA3	BGLAP
	MIR19A	CCL1
	TFAM	CXCL6
	FMR1	CXCL12
	PRSS2	SELL
	DUSP2	TNMD
	EFEMP1	FN3K
	SIM1	GREM2
	NQO1	SMURF2
	MAP2K1	SI
	AKR1B10	IPPK
	GANAB	NORAD
	IL2RB	SKIL
	CFI	SKP2
	WDR60	MARCKSL1
	SYK	SLC2A4
	PROM1	NCF1
	ZNHIT3	SLC7A2
	PRKCSH	SLC12A1
	LOC109623489	SLC22A3
	LYZ	SLC22A2
	CHGA	SLPI
	CHIT1	FSCN1
	ADORA1	BNIP3
	EXOSC4	MIR544A
	MIR200A	SOD3
	SLC7A9	SORD
	TGFBR1	SOS1
	PLA2G2A	SOX2
	KITLG	SP1
	CD55	SPINK1
	TNFSF13B	SREBF2
	BMP3	SRY
	RNLS	STC1
	ECE1	STIM1
	DDAH2	SUV39H1
	KCNJ3	MIR449B
	LOC108251801	TCF7
	HTT	TERC
	ITGB3	TERF1
	HOGA1	TFPI
	BHLHA15	TFRC
	MT-RNR1	TGFB2
	LAP3	TGFB3
	PPP1R15A	TGFBR1
	APEX1	TGM2
	NKX6-2	THBD
	SAA4	TPD52
	NEAT1	CRISP2
	LGALS3	TRAF5
	CCR1	TRAF6
	APTX	C3AR1
	NCS1	ACTG2
	ATRIP	TRH
	USB1	TRPC5
	PTPN2	TSC1
	FTH1	TWIST1
	CD274	UBE2V1
	POLD1	UCHL1
	THSD7A	UCP3
	COQ9	UGT8
	WDR20	VAV1
	EYA1	VEGFB
	DCN	EZR
	IL7	WARS1
	YWHAE	WT1
	CD19	XIST
	KDM4C	XRCC1
	NLRP5	YWHAZ
	NNAT	ZFP36
	KLRK1	CNBP
	MMP7	MZF1
	NGLY1	ZBTB16
	CFAP410	ZNF236
	TNXB	DUSP26
	TLR10	EFHD2
	MIR141	FSD1
	PRKD1	CALB1
	MCL1	PLA2G7
	DOCK8	NTT
	GRB2	SLC52A2
	KIF3A	RHBDF2
	SPG7	NLRX1
	MIP	GSDMD
	MT-ND2	VASH2
	KIF12	LINC00472
	ANKS4B	CUL5
	TBC1D3G	COL18A1
	CXCR1	APOL3
	RETNLB	SETD7
	PRNP	TRIM11
	RECQL5	AKAP1
	NTRK2	TAM
	S100A9	AXIN2
	LDHA	FSD1L
	SIRT4	HMCN1
	GNAS-AS1	MIXL1
	HLA-G	NCALD
	CXCL9	MINDY4
	IGFBP4	BBOX1
	WNK1	WDR83
	BCAR1	NR0B2
	BECN1	MAK16
	NRIP1	MAP1LC3A
	PDPK1	SPZ1
	PRRC2A	ACCS
	WDR34	HAVCR2
	WDR73	RPPH1
	FGB	PDE5A
	TERT	PEA15
	CYP24A1	B3GALNT1
	TNFRSF10B	TNFSF10
	CMIP	RIPK2
	BLOC1S1	TNFRSF10D
	CLCNKA	IL18R1
	IL10RA	ALKBH1
	ATP6V1B1	BTRC
	SQSTM1	MGAM
	XIAP	HSPB3
	MMP8	CCNG2
	FGFR2	SOCS3
	ITGB1	GPRC5A
	ATP6AP2	ESAM
	IRF5	SLC16A3
	BBS12	AIFM1
	ACVRL1	IL1RL1
	PEG10	DSEL
	LECT2	MTDH
	NEK9	CD5L
	LPP	MSC
	PTK2B	MFHAS1
	TXN	COPB2
	SLC22A2	ADGRG1
	RUNX2	CD163
	PDGFD	SLIT2
	TNFRSF18	UBE4A
	DGKE	SLC22A6
	MRE11	PPIG
	PQBP1	MYOCD
	CXCR3	SLC22A8
	PTER	CD80
	PLAUR	NTN1
	SIX1	EIF2AK3
	ALK	PICK1
	SFTPD	CD40LG
	ITGAE	SOCS5
	SOST	CD74
	SALL1	RB1CC1
	SPARC	SEPTIN7
	NLRP2	NUAK1
	NLRP7	GFPT2
	ACP5	DMTF1
	NOX1
	MIR16-1
	CNDP2
	SERPINA7
	S100B
	DNMT3L
	PEG3
	PAGR1
	KHDC3L
	FAM50B
	PARD6G-AS1
	PLAU
	LIFR
	MCF2L2
	CA4
	CMA1
	RAB8A
	AQP1
	HDAC9
	COL1A1
	PRKACA
	CX3CL1
	DCAF8
	MDM2
	CA2
	KMT2D
	BBS9
	C1GALT1C1
	CYP2C19
	LRPAP1
	BTK
	IL1RAPL2
	IFT122
	CX3CR1
	ERBB4
	PMM2
	SRD5A3
	SRGAP1
	GCM2
	GFND1
	CCR2
	COQ8B
	SMAD1
	HELLS
	MIR135A1
	MIR23B
	CDK6
	CDK1
	LAG3
	XYLT2
	CD163
	ALPP
	SH2B1
	ERCC6
	MIR186
	EHMT2
	MIR423
	GHSR
	RAD51
	MIR378A
	MX1
	FEN1
	IBSP
	ITGA2B
	CD226
	EGR1
	ATRIP-TREX1
	KIT
	HOTAIR
	SOX9
	DKK1.00
	MIR200B
	SMARCA4
	JAG1
	ADRB1
	FGF1
	EPRS1
	EPHX2
	PMPCA
	MIRLET7B
	ARL13B
	PDGFRB
	PIGN
	MVK
	ACTL7A
	VEGFC
	CLCN1
	U2AF1
	IL3
	TNFRSF8
	PYCARD
	SCARB2
	COQ8A
	CD14
	MAT1A
	S100A12
	SMAD7
	ALOX5
	BCL2L1
	LRP1
	UPK3A
	PCNA
	UROD
	CNTLN
	CHN2
	CHKB
	STT3A
	VPREB1
	IL21
	OSM
	ADAM10
	FCGR2A
	DNMT3A
	CCNA2
	SLC11A2
	NCAM1
	DRD1
	NES
	FABP5
	HLA-DRB4
	NEDD4L
	MIPEP
	XIST
	P2RX7
	SRY
	MYD88
	CCL4
	SNAI1
	NOTCH3
	NEK1
	BSG
	CFHR3
	SIK2
	TYR
	IYD
	DIO3
	CSF2RA
	TMSB15A
	AQP3
	CD59
	RHOD
	LTF
	RECQL
	IFT43
	SMPD1
	ATP6V0A2
	HBEGF
	ABCB11
	TRAP1
	RAB38
	CFLAR
	WNT11
	XYLT1
	CALR
	B9D2
	SAMHD1
	ARSA
	IL22
	MNT
	WDR81
	ABL1
	NLRP12
	PKD2L1
	TJP1
	THG1L
	ADAMTSL1
	RAF1
	SLC3A1
	CRB2
	TEX14
	PROX1
	THY1
	TGFBI
	VNN1.00
	TGFB3
	PRKAG2
	LIMK2
	KIF17
	MMP12
	IL11
	PKDREJ
	POU5F1
	CCND2
	TRPM6
	ELANE
	ZEB1
	SLC16A1
	WHAMM
	TRPC1
	SLC19A3
	SPTBN2
	PKD1L2
	CPB2
	LAMB1
	PROS1
	FCGR3B
	TYMP
	SERPINH1
	HDAC1
	PGM3
	BMPR2
	EZH2
	IFT52
	MIR23A
	NEDD4
	LOX
	DNM1L
	TPRKB
	MIR26A1
	IL23R
	HRH2
	ASS1
	CALD1
	NTRK1
	DNAJB11
	PRKN
	CAMP
	ALG2
	ALG9
	FUT8
	MITF
	RAB3IP
	BCL2L11
	RB1
	TCTN2
	B9D1
	MST1
	WDR45
	SIX5
	COX5A
	MMUT
	IL4R
	CDH13
	C1QTNF3
	ADH1B
	NR1H3
	PSMA6
	HAX1
	PKD1L1
	PKD2L2
	PKD1L3
	CC2D2B
	PALLD
	VDAC1
	MIR200C
	ABCG2
	MUS81
	DSTYK
	RPGRIP1
	SMARCA1
	IFT20
	PIFO
	HSPA1B
	PIGR
	VEGFB
	MIOX
	TNFRSF13B
	ADAMTS9
	COL4A6
	RAD52
	AQP11
	FOXC1
	PTPRO
	MIR9-1
	PSAP
	RMI2
	PITX2
	FANCM
	CHAT
	REL
	SERPINB2
	KLK3
	CNTNAP2
	ATP8B1
	UBE3A
	EXO1
	TNFSF12
	LOC111365141
	TBXAS1
	SOX11
	CXCL5
	SEC63
	MIR199B
	CEP164
	PPIA
	CFP
	PKM
	MT-CYB
	F2RL1
	COL8A1
	NPY1R
	CASC2
	KCNK5
	NOD1
	SLC22A1
	CTSK
	BDKRB1
	TRAF6
	SLC26A9
	GFRA1
	MOGS
	UCA1
	DVL1
	MTMR2
	WNT9B
	HOXB7
	SBF2
	ARL13A
	WNK4
	ALG12
	HPX
	HDAC6
	MCU
	THPO
	ZNF236
	ROCK1
	XRCC1
	ANG
	ALPL
	SEMA3A
	MCAM
	ENSA
	GBA
	WNK3
	PEX3
	MIRLET7E
	GCH1
	PKD3
	LIF
	RPS27A
	ENO2
	FUCA1
	NAT2
	IL33
	COPA
	TCTN1
	OPLAH
	WNT4
	ROBO1
	CYP2R1
	SASH1
	HSPA1L
	KIAA0319L
	DZIP1L
	PTPRQ
	PKD1P1
	IGHE
	ICOS
	PAX3
	AIF1
	DEFA3
	DRD4
	P2RX4
	HAS2
	EIF4EBP1
	CPVL
	COQ5
	CTCF
	NID1
	CXCL16
	LAMA5
	DNM2
	UNC119B
	NCOA3
	USP7
	UNC13B
	STIM1
	SLC4A1
	IFNL3
	SMARCA2
	SIX2
	EMX2
	SDC2
	ATN1
	LCOR
	OSGEPL1
	CTAG1B
	CCAT1
	LRRC7
	ACTL7B
	CYP11B1
	TBC1D1
	ITGA3
	RAG1
	JAK3
	IRF7
	AFF3
	GPC3
	UTS2R
	LAMP1
	TFF1
	ITGA1
	GDAP1
	NBEAL2
	IFT57
	HPS3
	FRAS1
	SH3TC2
	C12orf29
	NAGS
	SHPK
	HNRNPH2
	MMP10
	ITGAL
	PRDX1
	ABCG5
	RAB7A
	HOXD13
	RMI1
	ANXA2
	DLC1
	MCTP2
	SDC4
	EZR
	DRD3
	ALOX5AP
	KLF4
	PLCG1
	SPHK1
	CALB1
	SLC4A4
	PARK7
	LTBP1
	STK39
	ESM1
	MAP3K5
	BIRC3
	ASL
	TALDO1
	RPS3A
	EDN3
	MSRB3
	TUBA1A
	AUH
	RPS12
	PRSS8
	KLHL3
	SCAF4
	MBP
	NFAT5
	PLCE1
	HPSE2
	CCR3
	S100A4
	KLF6
	TNFRSF6B
	IGFBP5
	OTC
	TK2
	TOP3A
	RSAD2
	PGR
	UPK1A
	KCNJ16
	PHEX
	C4B
	NPNT
	BID
	DNMT3B
	GNAQ
	GP6
	IPPK
	CSNK1D
	SLIT3
	FCGR3A
	NR1I2
	C5
	NLRC4
	TMEM138
	GALNT2
	SLC27A5
	NTN1
	FSHB
	RP1
	GRIA3
	IFNGR1
	SLC7A1
	MSR1
	SSTR2
	FOXD1
	ERVW-1
	MIR497
	ADCYAP1
	DCX
	FBL
	DEFA1
	HDAC4
	DNASE1
	DIABLO
	SMARCB1
	DUOX2
	AGPAT1
	RGMA
	FN3K
	IL9
	SLC3A2
	LAMP2
	SLC1A7
	VPS11
	VPS39
	ATP1A2
	ANGPTL2
	TRIM28
	GNA11
	RAB7B
	MECOM
	IL18BP
	MIR130B
	SLC26A3
	DNAJC13
	ANKS6
	TMEM147
	KCNMA1
	PROCR
	LSM2.00
	CYP2J2
	OPTN
	RAB27A
	RAB11A
	PSMD14
	MYOM2
	COQ4
	ATL1
	HAVCR2
	LGALS1
	GJA4
	CASP4
	TRIM21
	KLRC1
	SLC17A1
	MAGEA3
	LRG1
	ZMIZ1
	MTHFD1L
	CTBP1
	ITGAX
	CCN3
	CLDN14
	SLC26A6
	CCP110
	CEP97
	ANKS3
	FAM186B
	PRNT
	NOTCH4
	RGS1
	TNFSF13
	MASP2
	KLK1
	M6PR
	LOC110283621
	GRN
	DDOST
	ZEB2
	CHD7
	MGAT2
	PDSS1
	SNAP29
	COQ6
	OTOF
	P2RX5
	AP1S1
	TAX1BP3
	YRDC
	SLC66A1
	PCAT1
	P2RX5-TAX1BP3
	ANKRD26
	DEFB1
	TRAF3
	FCRL3
	ITPR1
	APLNR
	IKBKG
	ARG2
	MOK
	OAT
	SLC7A6
	PLA2G4A
	MIR133B
	ASIC5
	CD248
	AAGAB
	BLOC1S3
	SLC35D3
	HAS3
	ENHO
	CASP12
	ALCAM
	CELA1
	CD24
	HYOU1
	PML
	CTTN
	CCL20
	MED13L
	SMAD5
	GSTA1
	ABCG8
	SLC22A3
	SKIL
	LIPA
	MTRR
	HPS5
	KIRREL1
	NME2
	NCOA2
	BLZF1
	TNC
	AREG
	TOP1.00
	NSF
	VPS45
	ABCC2
	COL3A1
	CUL3
	MIR335
	PGM1
	BTD
	E2F1
	TYRO3
	IL19
	MIRLET7C
	ITGB6
	CEBPA
	PSRC1
	EFNB2
	AHSP
	IRAK1
	GLB1
	MT-TV
	RNF10
	SUV39H1
	TCF3
	ERRFI1
	MIR9-3
	ELMO2
	CASQ1
	PHLPP1
	APAF1
	ALG1
	TGM1
	PLOD3
	TRPV5
	PSMB5
	VPS33A
	H3-2
	MIR26A2
	GFPT2
	DCC
	DES
	ADAM17
	RXFP1
	FBN2
	SLC7A8
	MX2
	ARAP1-AS2
	CNKSR3
	TXNRD1
	SOX2-OT
	LYVE1
	ISG20
	COX4I1
	TRA
	RASGRP1
	XPO1
	TRPV6
	GJB6
	SLC34A3
	FREM1
	TRIP13
	HPS6
	LYST
	MAN2A2
	VPS18
	VPS8
	TGFBRAP1
	GREB1L
	BLOC1S5
	VPS16
	C16orf58
	BLOC1S4
	TP73-AS1
	MIR331
	PDIA3P1
	INSRR
	RENBP
	MAP2K2
	CYLD
	GPR55
	ADD2
	MDK
	CASP7
	SKP2
	HMCN1
	PAX5
	TRPM1
	CCNB1
	TKTL1
	TNFRSF10D
	MAPK9
	ARAP1-AS1
	MIR9-2
	HSP90B1
	MECP2
	IL5RA
	CRYZ
	LOC110673971
	PREP
	IRF3
	EEF1A1
	RARA
	TET2
	ACTC1
	RELN
	SRSF1
	CHD1L
	FAM135A
	ATP1A1
	SLC2A5
	SCAF8
	CXCR6
	MT2A
	KHK
	GSK3A
	RBMS1
	CYP3A5
	ANXA1
	ADA2
	PAX8
	STS
	AGMO
	HSD3B2
	TWIST2
	CADM1
	ILK
	MIR646HG
	CCN1
	SEZ6L
	SLC2A10
	TWIST1
	UGCG
	ZFYVE9
	MIR152
	MIRLET7A3
	UCHL1
	SLC7A7
	GRAMD2B
	F12
	VCL
	STX8
	STAB1
	TMPO
	GLRA3
	DDAH1
	FOXP1
	ANGPTL3
	MIRLET7A2
	FMN2
	ACTA1
	SLC6A2
	SOAT1
	SLC2A12
	CD27
	RNF5
	ST6GALNAC2
	MIR196A2
	CTSG
	NDST1
	MCM10
	HSPB2
	IRF4
	ATP6V0A4
	A4GALT
	ATOH7
	NME1-NME2
	S100A1
	ST6GAL1
	XRCC3
	KLF15
	MIR215
	CNSN
	DDX58
	RARB
	TYMS
	OGN
	CXCR2
	RXRG
	CLDN1
	CLCN7
	USP14
	DPAGT1
	SPRY1
	COQ7
	DDB1
	DNA2
	TRNT1
	PITPNA
	SENP8
	GOSR1
	ESPN
	ARFRP1
	CENPB
	KIAA0586
	MYO15A
	ZNF189
	UBR3
	PIF1
	EMP1
	PLEKHF1
[truncated: 1,083 more rows]
